# Supplementary material for: Microbe transmission from pet shop to lab-reared zebrafish reveals a pathogenic birnavirus
Source: PubMed Central journal article supplement (PMC11139271; doi:10.1371/journal.pbio.3002606), 2024-05-30
Supplement: pbio.3002606.s001.pdf [file pbio.3002606.s001.pdf]

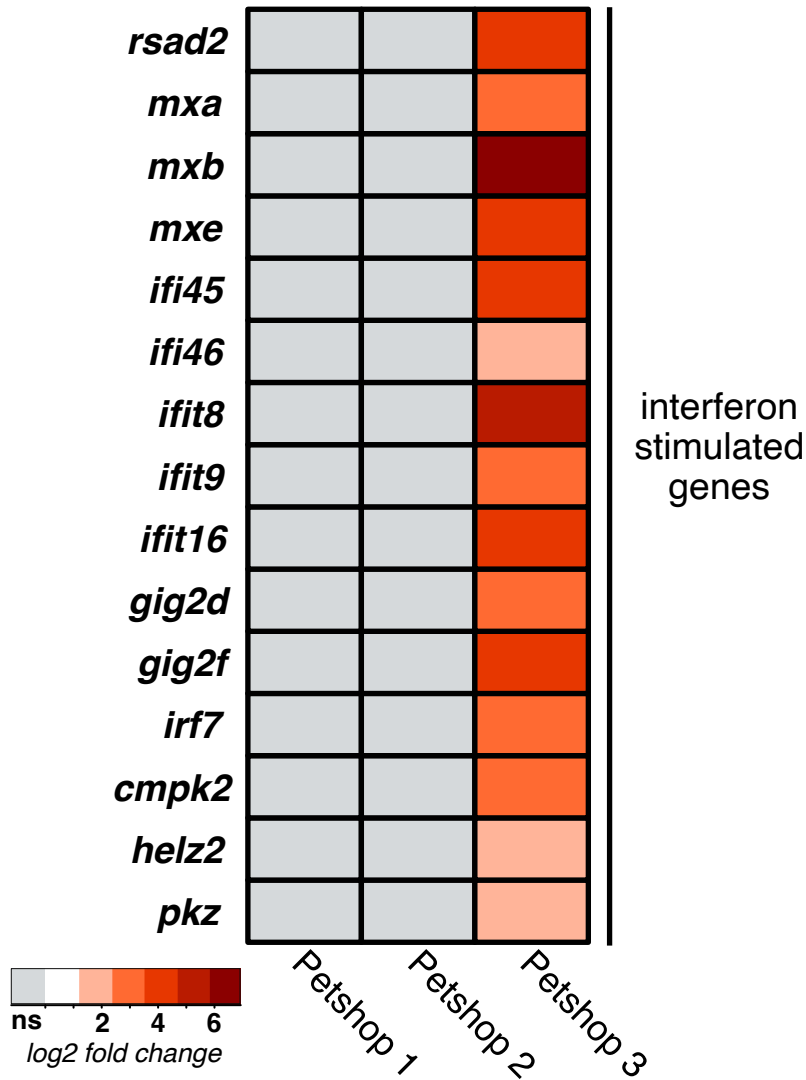

**S1 Figure. Antiviral gene expression in zebrafish from pet trade sources compared to control zebrafish from the laboratory.** Differential gene expression was measured for the three replicates from each pet trade source compared to the three laboratory replicates (data in S4 File). Log<sub>2</sub> fold change values are plotted for a selected set of antiviral genes with adjusted p-values < 0.1.
