# Supplementary material for: Microbe transmission from pet shop to lab-reared zebrafish reveals a pathogenic birnavirus
Source: PubMed Central journal article supplement (PMC11139271; doi:10.1371/journal.pbio.3002606), 2024-05-30
Supplement: pbio.3002606.s007.pdf [file pbio.3002606.s007.pdf]

A

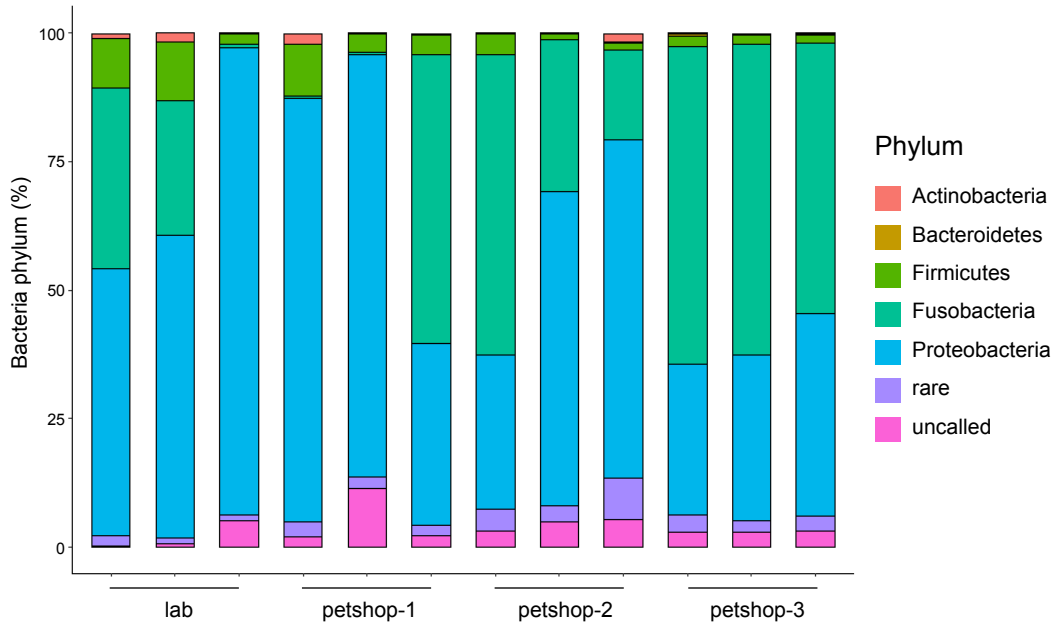

B

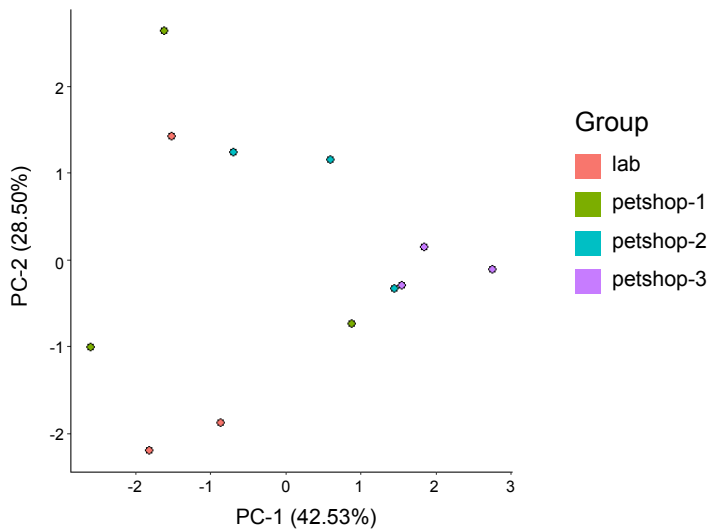

**Supplemental file 5 Gut microbiome composition of lab and pet store zebrafish.** A) bar graphs illustrating bacteria relative abundance by phylum. Relative abundance was calculated from normalized read counts from each sample. Each column represents an individual fish intestine sample. N = 3 for each group. Note large degree of variation between individuals and between groups. B) Principal component analysis using relative abundances of each bacteria phylum per individual zebrafish. PC-1 and PC-2 combined account for ~ 70% of variation between samples. Note large variation within and between groups. Small sample size per group (n = 3) prevented us from plotting a 95% confidence ellipse for each group. A & B) generated with ggplot2 in R studio.
